# Supplementary material for: Phenotypic and Genotypic Analysis of Bacterial Pathogens Recovered from Patients Diagnosed with Fever of Unknown Origin in Egypt
Source: MDPI journal article supplement (doi:10.3390/antibiotics12081294), 2023-08-07
Supplement: s1 [file s1]

## Supplementary Material

|                             | Cefaclor | Gentamicin10 | Amikacin | Ceftriaxone | Ciprofloxacin | Ofloxacin | Levofloxacin | Amoxicillin-clavulanic acid | Ampicillin-sulbactam | Piperacillin tazobactam | Cefepime | Ceftazidime | Cefotaxime | Ceftazidime | Cefoxitin | Meropenem | Imipenem | Doxycycline | Colistin | Nitrofurantoin | Norfloxacin | Ampicillin |
|-----------------------------|----------|--------------|----------|-------------|---------------|-----------|--------------|-----------------------------|----------------------|-------------------------|----------|-------------|------------|-------------|-----------|-----------|----------|-------------|----------|----------------|-------------|------------|
| Cefaclor                    |          |              |          |             |               |           |              |                             |                      |                         |          |             |            |             |           |           |          |             |          |                |             |            |
| Gentamicin10                | 0.073    |              |          |             |               |           |              |                             |                      |                         |          |             |            |             |           |           |          |             |          |                |             |            |
| Amikacin                    | 0.503    | 0.003        |          |             |               |           |              |                             |                      |                         |          |             |            |             |           |           |          |             |          |                |             |            |
| Ceftriaxone                 | 0.186    | 0.45         | 0.561    |             |               |           |              |                             |                      |                         |          |             |            |             |           |           |          |             |          |                |             |            |
| Ciprofloxacin               | 0.002    | 0.023        | 0.222    | 0.006       |               |           |              |                             |                      |                         |          |             |            |             |           |           |          |             |          |                |             |            |
| Ofloxacin                   | 0.001    | 0.032        | 0.249    | 0.004       | 0.001         |           |              |                             |                      |                         |          |             |            |             |           |           |          |             |          |                |             |            |
| Levofloxacin                | 0.002    | 0.148        | 0.054    | 0.009       | 0.001         | 0.001     |              |                             |                      |                         |          |             |            |             |           |           |          |             |          |                |             |            |
| Amoxicillin-clavulanic acid | 0.007    | 0.195        | 0.46     | 0.001       | 0.034         | 0.026     | 0.045        |                             |                      |                         |          |             |            |             |           |           |          |             |          |                |             |            |
| Ampicillin-sulbactam        | 0.003    | 0.041        | 0.561    | 0.571       | 0.001         | 0.001     | 0.009        | 0.245                       |                      |                         |          |             |            |             |           |           |          |             |          |                |             |            |
| Piperacillin tazobactam     | 0.001    | 0.091        | 0.151    | 0.001       | 0.001         | 0.001     | 0.001        | 0.001                       | 0.001                |                         |          |             |            |             |           |           |          |             |          |                |             |            |
| Cefepime                    | 0.001    | 0.01         | 0.155    | 0.186       | 0.012         | 0.009     | 0.002        | 0.007                       | 0.065                | 0.001                   |          |             |            |             |           |           |          |             |          |                |             |            |
| Ceftazidime                 | 0.001    | 0.155        | 0.114    | 0.011       | 0.001         | 0.001     | 0.001        | 0.018                       | 0.045                | 0.001                   | 0.001    |             |            |             |           |           |          |             |          |                |             |            |
| Cefotaxime                  | 0.001    | 0.195        | 0.134    | 0.006       | 0.001         | 0.001     | 0.001        | 0.012                       | 0.096                | 0.001                   | 0.001    | 0.001       |            |             |           |           |          |             |          |                |             |            |
| Ceftazidime                 | 0.001    | 0.029        | 0.098    | 0.019       | 0.002         | 0.001     | 0.001        | 0.005                       | 0.068                | 0.001                   | 0.001    | 0.001       | 0.001      |             |           |           |          |             |          |                |             |            |
| Cefoxitin                   | 0.005    | 0.016        | 0.105    | 0.002       | 0.001         | 0.001     | 0.007        | 0.015                       | 0.031                | 0.001                   | 0.026    | 0.008       | 0.015      | 0.004       |           |           |          |             |          |                |             |            |
| Meropenem                   | 0.032    | 0.005        | 0.001    | 0.035       | 0.001         | 0.001     | 0.001        | 0.024                       | 0.141                | 0.001                   | 0.032    | 0.018       | 0.024      | 0.013       | 0.001     |           |          |             |          |                |             |            |
| Imipenem                    | 0.032    | 0.005        | 0.001    | 0.035       | 0.001         | 0.001     | 0.001        | 0.024                       | 0.141                | 0.001                   | 0.032    | 0.018       | 0.024      | 0.013       | 0.001     | 0.001     |          |             |          |                |             |            |
| Doxycycline                 | 0.142    | 0.525        | 0.596    | 0.01        | 0.131         | 0.089     | 0.084        | 0.005                       | 0.387                | 0.177                   | 0.047    | 0.148       | 0.089      | 0.225       | 0.199     | 0.237     | 0.237    |             |          |                |             |            |
| Colistin                    | 0.358    | 0.555        | 0.786    | 0.493       | 0.686         | 0.702     | 0.67         | 0.62                        | 0.507                | 0.637                   | 0.358    | 0.402       | 0.38       | 0.424       | 0.732     | 0.358     | 0.358    | 0.732       |          |                |             |            |
| Nitrofurantoin              | 0.028    | 0.003        | 0.993    | 0.506       | 0.019         | 0.036     | 0.039        | 0.201                       | 0.066                | 0.365                   | 0.012    | 0.185       | 0.265      | 0.03        | 0.007     | 0.174     | 0.174    | 0.989       | 0.857    |                |             |            |
| Norfloxacin                 | 0.001    | 0.001        | 0.651    | 0.297       | 0.001         | 0.001     | 0.001        | 0.062                       | 0.014                | 0.001                   | 0.001    | 0.01        | 0.025      | 0.001       | 0.001     | 0.006     | 0.006    | 0.088       | 0.705    | 0.001          |             |            |
| Ampicillin                  | NS       | NS           | NS       | ND          | ND            | ND        | ND           | ND                          | ND                   | ND                      | ND       | ND          | ND         | ND          | ND        | ND        | ND       | ND          | ND       | ND             | ND          |            |

Figure S1: Matrix showing the association between antimicrobial resistance phenotypes and the tested antimicrobial in *Escherichia coli*. Where appropriate, the *P*-values were calculated using the Chi-Square or Fisher's exact tests. Significant associations with *p*-values  $\leq 0.05$  are highlighted with a yellow color. ND, *p*-values could not be determined as all isolates showed the same phenotype (resistant or susceptible).

|                             | Cefaclor | Gentamicin10 | Amikacin | Cotrimoxazole | Ciprofloxacin | Ofloxacin | Levofloxacin | Amoxacillin-Clavulanic acid | Ampicillin-sulbactam | Piperacillin tazobactam | Cefepime | Ceftriaxone | Cefotaxime | Ceftazidime | Cefoxitin | Meropenem | Imipenem | Doxycycline | Colistin | Nitrofurantoin | Norfloxacin | Ampicillin |
|-----------------------------|----------|--------------|----------|---------------|---------------|-----------|--------------|-----------------------------|----------------------|-------------------------|----------|-------------|------------|-------------|-----------|-----------|----------|-------------|----------|----------------|-------------|------------|
| Cefaclor                    |          |              |          |               |               |           |              |                             |                      |                         |          |             |            |             |           |           |          |             |          |                |             |            |
| Gentamicin10                | 0.001    |              |          |               |               |           |              |                             |                      |                         |          |             |            |             |           |           |          |             |          |                |             |            |
| Amikacin                    | 0.001    | 0.001        |          |               |               |           |              |                             |                      |                         |          |             |            |             |           |           |          |             |          |                |             |            |
| Cotrimoxazole               | 0.001    | 0.001        | 0.001    |               |               |           |              |                             |                      |                         |          |             |            |             |           |           |          |             |          |                |             |            |
| Ciprofloxacin               | 0.002    | 0.001        | 0.001    | 0.003         |               |           |              |                             |                      |                         |          |             |            |             |           |           |          |             |          |                |             |            |
| Ofloxacin                   | 0.001    | 0.001        | 0.001    | 0.001         | 0.001         |           |              |                             |                      |                         |          |             |            |             |           |           |          |             |          |                |             |            |
| Levofloxacin                | 0.004    | 0.001        | 0.001    | 0.004         | 0.001         | 0.001     |              |                             |                      |                         |          |             |            |             |           |           |          |             |          |                |             |            |
| Amoxacillin-Clavulanic acid | 0.006    | 0.007        | 0.002    | 0.001         | 0.02          | 0.001     | 0.001        |                             |                      |                         |          |             |            |             |           |           |          |             |          |                |             |            |
| Ampicillin-sulbactam        | 0.005    | 0.001        | 0.001    | 0.001         | 0.034         | 0.001     | 0.004        | 0.001                       |                      |                         |          |             |            |             |           |           |          |             |          |                |             |            |
| Piperacillin tazobactam     | 0.002    | 0.001        | 0.001    | 0.001         | 0.001         | 0.001     | 0.001        | 0.001                       | 0.006                |                         |          |             |            |             |           |           |          |             |          |                |             |            |
| Cefepime                    | 0.001    | 0.001        | 0.001    | 0.001         | 0.008         | 0.001     | 0.001        | 0.004                       | 0.014                | 0.001                   |          |             |            |             |           |           |          |             |          |                |             |            |
| Ceftriaxone                 | 0.001    | 0.001        | 0.001    | 0.002         | 0.003         | 0.001     | 0.001        | 0.005                       | 0.08                 | 0.001                   | 0.001    |             |            |             |           |           |          |             |          |                |             |            |
| Cefotaxime                  | 0.001    | 0.014        | 0.001    | 0.01          | 0.159         | 0.001     | 0.004        | 0.005                       | 0.001                | 0.001                   | 0.001    | 0.001       |            |             |           |           |          |             |          |                |             |            |
| Ceftazidime                 | 0.001    | 0.001        | 0.001    | 0.001         | 0.001         | 0.001     | 0.001        | 0.009                       | 0.01                 | 0.001                   | 0.001    | 0.001       | 0.001      |             |           |           |          |             |          |                |             |            |
| Cefoxitin                   | 0.008    | 0.001        | 0.001    | 0.004         | 0.015         | 0.001     | 0.001        | 0.001                       | 0.012                | 0.001                   | 0.002    | 0.017       | 0.004      | 0.003       |           |           |          |             |          |                |             |            |
| Meropenem                   | 0.001    | 0.001        | 0.001    | 0.001         | 0.001         | 0.001     | 0.001        | 0.002                       | 0.001                | 0.001                   | 0.001    | 0.001       | 0.001      | 0.001       | 0.001     |           |          |             |          |                |             |            |
| Imipenem                    | 0.001    | 0.001        | 0.001    | 0.001         | 0.001         | 0.001     | 0.001        | 0.001                       | 0.001                | 0.001                   | 0.001    | 0.001       | 0.001      | 0.001       | 0.001     | 0.001     |          |             |          |                |             |            |
| Doxycycline                 | 0.001    | 0.363        | 0.456    | 0.09          | 0.173         | 0.363     | 0.356        | 0.031                       | 0.418                | 0.14                    | 0.138    | 0.09        | 0.218      | 0.001       | 0.263     | 0.542     | 0.369    |             |          |                |             |            |
| Colistin                    | 0.684    | 0.633        | 0.509    | 0.53          | 0.422         | 0.198     | 0.251        | 0.741                       | 0.485                | 0.296                   | 0.554    | 0.53        | 0.53       | 0.656       | 0.329     | 0.134     | 0.154    | 0.125       |          |                |             |            |
| Nitrofurantoin              | 0.001    | 0.013        | 0.009    | 0.01          | 0.142         | 0.084     | 0.759        | 0.868                       | 0.108                | 0.076                   | 0.001    | 0.008       | 0.001      | 0.034       | 0.276     | 0.001     | 0.003    | 0.036       | 0.504    |                |             |            |
| Norfloxacin                 | 0.001    | 0.003        | 0.013    | 0.001         | 0.02          | 0.001     | 0.052        | 0.035                       | 0.001                | 0.15                    | 0.001    | 0.001       | 0.001      | 0.001       | 0.074     | 0.001     | 0.004    | 0.001       | 0.504    | 0.001          |             |            |
| Ampicillin                  | ND       | ND           | ND       | ND            | ND            | ND        | ND           | ND                          | ND                   | ND                      | ND       | ND          | ND         | ND          | ND        | ND        | ND       | ND          | ND       | ND             | ND          |            |

Figure S2: Matrix showing the association between antimicrobial resistance phenotypes and the tested antimicrobial in *Klebsiella pneumoniae*. Where appropriate, the *P*-values were calculated using the Chi-Square or Fisher's exact tests. Significant associations with *p*-values  $\leq 0.05$  are highlighted with a yellow color. ND, *p*-values could not be determined as all isolates showed the same phenotype (resistant or susceptible).

|                         | Gentamicin10 | Amikacin | Cotrimoxazole | Ciprofloxacin | Levofloxacin | Ampicillin-sulbactam | Piperacillin tazobactam | Cefepime | Ceftriaxone | Cefotaxime | Ceftazidime | Meropenem | Imipenem | Doxycycline | Colistin | Nitrofurantoin | Norfloxacin |
|-------------------------|--------------|----------|---------------|---------------|--------------|----------------------|-------------------------|----------|-------------|------------|-------------|-----------|----------|-------------|----------|----------------|-------------|
| Gentamicin10            |              |          |               |               |              |                      |                         |          |             |            |             |           |          |             |          |                |             |
| Amikacin                | 0.001        |          |               |               |              |                      |                         |          |             |            |             |           |          |             |          |                |             |
| Cotrimoxazole           | 0.062        | 0.062    |               |               |              |                      |                         |          |             |            |             |           |          |             |          |                |             |
| Ciprofloxacin           | 0.031        | 0.031    | 0.046         |               |              |                      |                         |          |             |            |             |           |          |             |          |                |             |
| Levofloxacin            | 0.236        | 0.236    | 0.322         | 0.031         |              |                      |                         |          |             |            |             |           |          |             |          |                |             |
| Ampicillin-sulbactam    | 0.085        | 0.085    | 0.008         | 0.009         | 0.085        |                      |                         |          |             |            |             |           |          |             |          |                |             |
| Piperacillin tazobactam | 0.004        | 0.004    | 0.008         | 0.009         | 0.085        | 0.027                |                         |          |             |            |             |           |          |             |          |                |             |
| Cefepime                | ND           | ND       | ND            | ND            | ND           | ND                   | ND                      |          |             |            |             |           |          |             |          |                |             |
| Ceftriaxone             | 0.192        | 0.192    | 0.231         | 0.077         | 0.192        | 0.115                | 0.115                   | ND       |             |            |             |           |          |             |          |                |             |
| Cefotaxime              | ND           | ND       | ND            | ND            | ND           | ND                   | ND                      | ND       | ND          |            |             |           |          |             |          |                |             |
| Ceftazidime             | 0.085        | 0.085    | 0.008         | 0.009         | 0.085        | 0.001                | 0.027                   | ND       | 0.115       | ND         |             |           |          |             |          |                |             |
| Meropenem               | 0.004        | 0.004    | 0.562         | 0.222         | 0.488        | 0.319                | 0.319                   | ND       | 0.115       | ND         | 0.319       |           |          |             |          |                |             |
| Imipenem                | 0.014        | 0.014    | 0.676         | 0.711         | 0.4          | 0.592                | 0.408                   | ND       | 0.846       | ND         | 0.592       | 0.052     |          |             |          |                |             |
| Doxycycline             | 0.03         | 0.03     | 0.404         | 0.28          | 0.578        | 0.14                 | 0.14                    | ND       | 0.538       | ND         | 0.14        | 0.14      | 0.359    |             |          |                |             |
| Colistin                | ND           | ND       | ND            | ND            | ND           | ND                   | ND                      | ND       | ND          | ND         | ND          | ND        | ND       | ND          |          |                |             |
| Nitrofurantoin          | 0.808        | 0.808    | 0.231         | 0.923         | 0.808        | 0.885                | 0.885                   | ND       | 0.962       | ND         | 0.885       | 0.885     | 0.846    | 0.462       | ND       |                |             |
| Norfloxacin             | 0.808        | 0.808    | 0.231         | 0.923         | 0.808        | 0.885                | 0.885                   | ND       | 0.962       | ND         | 0.885       | 0.885     | 0.846    | 0.462       | ND       | 0.038          |             |

Figure S3: Matrix showing the association between antimicrobial resistance phenotypes and the tested antimicrobial in *Acinetobacter baumannii*. Where appropriate, the *P*-values were calculated using the Chi-Square or Fisher's exact tests. Significant associations with *p*-values  $\leq 0.05$  are highlighted with a yellow color. ND, *p*-values could not be determined as all isolates showed the same phenotype (resistant or susceptible).

|                                | <b>Gentamicin 10</b> | <b>Amikacin</b> | <b>Ciprofloxacin</b> | <b>Ofloxacin</b> | <b>Levofloxacin</b> | <b>Piperacillin tazobactam</b> | <b>Cefepime</b> | <b>Ceftazidime</b> | <b>Meropenem</b> | <b>Imipenem</b> | <b>Colistin</b> |
|--------------------------------|----------------------|-----------------|----------------------|------------------|---------------------|--------------------------------|-----------------|--------------------|------------------|-----------------|-----------------|
| <b>Gentamicin 10</b>           |                      |                 |                      |                  |                     |                                |                 |                    |                  |                 |                 |
| <b>Amikacin</b>                | 0.002                |                 |                      |                  |                     |                                |                 |                    |                  |                 |                 |
| <b>Ciprofloxacin</b>           | 0.051                | 0.015           |                      |                  |                     |                                |                 |                    |                  |                 |                 |
| <b>Ofloxacin</b>               | 0.529                | 0.296           | 0.051                |                  |                     |                                |                 |                    |                  |                 |                 |
| <b>Levofloxacin</b>            | 0.051                | 0.015           | 0.001                | 0.051            |                     |                                |                 |                    |                  |                 |                 |
| <b>Piperacillin tazobactam</b> | 0.7                  | 0.035           | 0.035                | 0.7              | 0.035               |                                |                 |                    |                  |                 |                 |
| <b>Cefepime</b>                | 0.385                | 0.5             | 0.5                  | 0.385            | 0.5                 | 0.33                           |                 |                    |                  |                 |                 |
| <b>Ceftazidime</b>             | 0.175                | 0.035           | 0.035                | 0.594            | 0.035               | 0.21                           | 0.67            |                    |                  |                 |                 |
| <b>Meropenem</b>               | 0.7                  | 0.035           | 0.035                | 0.07             | 0.035               | 0.001                          | 0.33            | 0.21               |                  |                 |                 |
| <b>Imipenem</b>                | 0.028                | 0.133           | 0.133                | 0.238            | 0.133               | 0.005                          | 0.231           | 0.545              | 0.005            |                 |                 |
| <b>Colistin</b>                | 0.571                | 0.5             | 0.5                  | 0.429            | 0.5                 | 0.714                          | 0.786           | 0.286              | 0.714            | 0.357           |                 |

Figure S4: Matrix showing the association between antimicrobial resistance phenotypes and the tested antimicrobial in *Pseudomonas aeruginosa*. Where appropriate, the *P*-values were calculated using the Chi-Square or Fisher's exact tests. Significant associations with *p*-values  $\leq 0.05$  are highlighted with a yellow color. ND, *p*-values could not be determined as all isolates showed the same phenotype (resistant or susceptible).

|                             | Cefaclor | Gentamicin 10 | Amikacin | Cotrimoxazole | Ciprofloxacin | Ofloxacin | Levofloxacin | Amoxicillin-Clavulanic acid | Ampicillin-sulbactam | Piperacillin tazobactam | Cefepime | Ceftriaxone | Cefotaxime | Ceftazidime | Cefoxitin | Meropenem | Imipenem | Doxycycline |
|-----------------------------|----------|---------------|----------|---------------|---------------|-----------|--------------|-----------------------------|----------------------|-------------------------|----------|-------------|------------|-------------|-----------|-----------|----------|-------------|
| Cefaclor                    |          |               |          |               |               |           |              |                             |                      |                         |          |             |            |             |           |           |          |             |
| Gentamicin 10               | 0.667    |               |          |               |               |           |              |                             |                      |                         |          |             |            |             |           |           |          |             |
| Amikacin                    | ND       | ND            |          |               |               |           |              |                             |                      |                         |          |             |            |             |           |           |          |             |
| Cotrimoxazole               | 0.667    | 0.333         | ND       |               |               |           |              |                             |                      |                         |          |             |            |             |           |           |          |             |
| Ciprofloxacin               | ND       | ND            | ND       | ND            |               |           |              |                             |                      |                         |          |             |            |             |           |           |          |             |
| Ofloxacin                   | 0.667    | 0.667         | ND       | 0.667         | ND            |           |              |                             |                      |                         |          |             |            |             |           |           |          |             |
| Levofloxacin                | 0.667    | 0.667         | ND       | 0.667         | ND            | 0.333     |              |                             |                      |                         |          |             |            |             |           |           |          |             |
| Amoxicillin-Clavulanic acid | 0.333    | 0.667         | ND       | 0.667         | ND            | 0.667     | 0.667        |                             |                      |                         |          |             |            |             |           |           |          |             |
| Ampicillin-sulbactam        | 0.333    | 0.667         | ND       | 0.667         | ND            | 0.667     | 0.667        | 0.333                       |                      |                         |          |             |            |             |           |           |          |             |
| Piperacillin tazobactam     | 0.667    | 0.667         | ND       | 0.667         | ND            | 0.333     | 0.333        | 0.667                       | 0.667                |                         |          |             |            |             |           |           |          |             |
| Cefepime                    | ND       | ND            | ND       | ND            | ND            | ND        | ND           | ND                          | ND                   | ND                      |          |             |            |             |           |           |          |             |
| Ceftriaxone                 | ND       | ND            | ND       | ND            | ND            | ND        | ND           | ND                          | ND                   | ND                      | ND       |             |            |             |           |           |          |             |
| Cefotaxime                  | ND       | ND            | ND       | ND            | ND            | ND        | ND           | ND                          | ND                   | ND                      | ND       | ND          |            |             |           |           |          |             |
| Ceftazidime                 | 0.667    | 0.667         | ND       | 0.667         | ND            | 0.333     | 0.333        | 0.667                       | 0.667                | 0.333                   | ND       | ND          | ND         |             |           |           |          |             |
| Cefoxitin                   | 0.667    | 0.333         | ND       | 0.333         | ND            | 0.667     | 0.667        | 0.667                       | 0.667                | 0.667                   | ND       | ND          | ND         | 0.667       |           |           |          |             |
| Meropenem                   | ND       | ND            | ND       | ND            | ND            | ND        | ND           | ND                          | ND                   | ND                      | ND       | ND          | ND         | ND          | ND        |           |          |             |
| Imipenem                    | ND       | ND            | ND       | ND            | ND            | ND        | ND           | ND                          | ND                   | ND                      | ND       | ND          | ND         | ND          | ND        | ND        |          |             |
| Doxycycline                 | ND       | ND            | ND       | ND            | ND            | ND        | ND           | ND                          | ND                   | ND                      | ND       | ND          | ND         | ND          | ND        | ND        | ND       |             |

Figure S5: Matrix showing the association between antimicrobial resistance phenotypes and the tested antimicrobial in *Proteus* sp. Where appropriate, the *P*-values were calculated using the Chi-Square or Fisher's exact tests. Significant associations with *p*-values  $\leq 0.05$  are highlighted with a yellow color. ND, *p*-values could not be determined as all isolates showed the same phenotype (resistant or susceptible).

|                               | Penicillin | Cefoxitin | Trimethoprim/Sulfamethoxazole | Clindamycin | Erythromycin | Azithromycin | Vancomycin | Doxycycline | Rifampicin | Linezolid | Ciprofloxacin | Ofloxacin | Levofloxacin | Gentamicin 10 |
|-------------------------------|------------|-----------|-------------------------------|-------------|--------------|--------------|------------|-------------|------------|-----------|---------------|-----------|--------------|---------------|
| Penicillin                    |            |           |                               |             |              |              |            |             |            |           |               |           |              |               |
| Cefoxitin                     | 0.111      |           |                               |             |              |              |            |             |            |           |               |           |              |               |
| Trimethoprim/Sulfamethoxazole | 0.913      | 0.652     |                               |             |              |              |            |             |            |           |               |           |              |               |
| Clindamycin                   | 0.676      | 0.154     | 0.826                         |             |              |              |            |             |            |           |               |           |              |               |
| Erythromycin                  | 0.739      | 0.611     | 0.478                         | 0.037       |              |              |            |             |            |           |               |           |              |               |
| Azithromycin                  | 0.692      | 0.51      | 0.435                         | 0.024       | 0.001        |              |            |             |            |           |               |           |              |               |
| Vancomycin                    | ND         | ND        | ND                            | ND          | ND           | ND           |            |             |            |           |               |           |              |               |
| Doxycycline                   | 0.676      | 0.154     | 0.826                         | 0.562       | 0.329        | 0.404        | ND         |             |            |           |               |           |              |               |
| Rifampicin                    | 0.913      | 0.652     | 0.957                         | 0.174       | 0.478        | 0.435        | ND         | 0.174       |            |           |               |           |              |               |
| Linezolid                     | ND         | ND        | ND                            | ND          | ND           | ND           | ND         | ND          | ND         |           |               |           |              |               |
| Ciprofloxacin                 | 0.308      | 0.195     | 0.435                         | 0.596       | 0.407        | 0.552        | ND         | 0.596       | 0.435      | ND        |               |           |              |               |
| Ofloxacin                     | 0.36       | 0.069     | 0.391                         | 0.517       | 0.567        | 0.637        | ND         | 0.517       | 0.391      | ND        | 0.001         |           |              |               |
| Levofloxacin                  | 0.415      | 0.013     | 0.348                         | 0.435       | 0.611        | 0.49         | ND         | 0.435       | 0.348      | ND        | 0.003         | 0.001     |              |               |
| Gentamicin 10                 | 0.415      | 0.013     | 0.348                         | 0.435       | 0.278        | 0.184        | ND         | 0.435       | 0.348      | ND        | 0.184         | 0.367     | 0.253        |               |

Figure S6: Matrix showing the association between antimicrobial resistance phenotypes and the tested antimicrobial in *Staphylococcus aureus*. Where appropriate, the *P*-values were calculated using the Chi-Square or Fisher's exact tests. Significant associations with *p*-values  $\leq 0.05$  are highlighted with a yellow color. ND, *p*-values could not be determined as all isolates showed the same phenotype (resistant or susceptible).

|                               | Cefoxitin | Trimethoprim/Sulfamethoxazole | Clindamycin | Erythromycin | Azithromycin | Vancomycin | Doxycycline | Rifampicin | Linezolid | Ciprofloxacin | Ofloxacin | Levofloxacin | Chloamphenicol | Imipenem | Cefotaxime |
|-------------------------------|-----------|-------------------------------|-------------|--------------|--------------|------------|-------------|------------|-----------|---------------|-----------|--------------|----------------|----------|------------|
| Cefoxitin                     |           |                               |             |              |              |            |             |            |           |               |           |              |                |          |            |
| Trimethoprim/Sulfamethoxazole | 0.714     |                               |             |              |              |            |             |            |           |               |           |              |                |          |            |
| Clindamycin                   | 0.429     | 0.286                         |             |              |              |            |             |            |           |               |           |              |                |          |            |
| Erythromycin                  | 0.571     | 0.714                         | 0.371       |              |              |            |             |            |           |               |           |              |                |          |            |
| Azithromycin                  | 0.571     | 0.714                         | 0.114       | 0.114        |              |            |             |            |           |               |           |              |                |          |            |
| Vancomycin                    | ND        | ND                            | ND          | ND           | ND           |            |             |            |           |               |           |              |                |          |            |
| Doxycycline                   | 0.429     | 0.714                         | 0.629       | 0.114        | 0.371        | ND         |             |            |           |               |           |              |                |          |            |
| Rifampicin                    | 0.857     | 0.714                         | 0.571       | 0.571        | 0.429        | ND         | 0.571       |            |           |               |           |              |                |          |            |
| Linezolid                     | ND        | ND                            | ND          | ND           | ND           | ND         | ND          | ND         |           |               |           |              |                |          |            |
| Ciprofloxacin                 | 0.286     | 0.524                         | 0.714       | 0.714        | 0.286        | ND         | 0.714       | 0.714      | ND        |               |           |              |                |          |            |
| Ofloxacin                     | ND        | ND                            | ND          | ND           | ND           | ND         | ND          | ND         | ND        | ND            |           |              |                |          |            |
| Levofloxacin                  | ND        | ND                            | ND          | ND           | ND           | ND         | ND          | ND         | ND        | ND            | ND        |              |                |          |            |
| Chloamphenicol                | ND        | ND                            | ND          | ND           | ND           | ND         | ND          | ND         | ND        | ND            | ND        | ND           |                |          |            |
| Imipenem                      | ND        | ND                            | ND          | ND           | ND           | ND         | ND          | ND         | ND        | ND            | ND        | ND           | ND             |          |            |
| Cefotaxime                    | ND        | ND                            | ND          | ND           | ND           | ND         | ND          | ND         | ND        | ND            | ND        | ND           | ND             | ND       |            |

Figure S7: Matrix showing the association between antimicrobial resistance phenotypes and the tested antimicrobial in *Streptococcus pneumoniae*. Where appropriate, the *P*-values were calculated using the Chi-Square or Fisher's exact tests. Significant associations with *p*-values  $\leq 0.05$  are highlighted with a yellow color. ND, *p*-values could not be determined as all isolates showed the same phenotype (resistant or susceptible).

|                | Penicillin | Erythromycin | Azithromycin | Vancomycin | Doxycycline | Rifampicin | Linezolid | Ciprofloxacin | Ofloxacin | Levofloxacin | Gentamicin 120 | Chloamphenicol | Ampicillin |
|----------------|------------|--------------|--------------|------------|-------------|------------|-----------|---------------|-----------|--------------|----------------|----------------|------------|
| Penicillin     |            |              |              |            |             |            |           |               |           |              |                |                |            |
| Erythromycin   | 0.116      |              |              |            |             |            |           |               |           |              |                |                |            |
| Azithromycin   | 0.116      | 0.001        |              |            |             |            |           |               |           |              |                |                |            |
| Vancomycin     | ND         | ND           | ND           |            |             |            |           |               |           |              |                |                |            |
| Doxycycline    | 0.286      | 0.45         | 0.45         | ND         |             |            |           |               |           |              |                |                |            |
| Rifampicin     | 0.613      | 0.55         | 0.55         | ND         | 0.418       |            |           |               |           |              |                |                |            |
| Linezolid      | ND         | ND           | ND           | ND         | ND          | ND         |           |               |           |              |                |                |            |
| Ciprofloxacin  | 0.618      | 0.307        | 0.307        | ND         | 0.328       | 0.672      | ND        |               |           |              |                |                |            |
| Ofloxacin      | 0.525      | 0.564        | 0.564        | ND         | 0.541       | 0.459      | ND        | 0.016         |           |              |                |                |            |
| Levofloxacin   | 0.475      | 0.564        | 0.564        | ND         | 0.186       | 0.459      | ND        | 0.016         | 0.002     |              |                |                |            |
| Gentamicin 120 | 0.387      | 0.223        | 0.223        | ND         | 0.157       | 0.418      | ND        | 0.265         | 0.015     | 0.015        |                |                |            |
| Chloamphenicol | 0.496      | 0.649        | 0.649        | ND         | 0.163       | 0.57       | ND        | 0.396         | 0.038     | 0.038        | 0.011          |                |            |
| Ampicillin     | 0.022      | 0.601        | 0.601        | ND         | 0.284       | 0.052      | ND        | 0.468         | 0.699     | 0.313        | 0.144          | 0.231          |            |

Figure S8: Matrix showing the association between antimicrobial resistance phenotypes and the tested antimicrobial in *Enterococci*. Where appropriate, the *P*-values were calculated using the Chi-Square or Fisher's exact tests. Significant associations with *p*-values  $\leq 0.05$  are highlighted with a yellow color. ND, *p*-values could not be determined as all isolates showed the same phenotype (resistant or susceptible).



**Table S1:** The MICs of the tested antimicrobial agents, phenotypic and molecular analysis of Carbapenemase-encoding genes, ESBLs, and *aac(6')Ib* of the tested isolates (*n* = 103):

| Bacterial species    | Resistance genes                                                                    |                                                                                      |                   | No. of isolates | MIC range |         |         |        |
|----------------------|-------------------------------------------------------------------------------------|--------------------------------------------------------------------------------------|-------------------|-----------------|-----------|---------|---------|--------|
|                      | ESBLs                                                                               | CPases                                                                               | <i>aac(6')-Ib</i> |                 | IMP       | CTX     | FEP     | CIP    |
| <i>E. coli</i>       | <i>bla</i> <sub>CTX-M</sub> , <i>bla</i> <sub>TEM</sub>                             | <i>bla</i> <sub>OXA-48</sub>                                                         | +                 | 15              | 16–265    | 24–512  | 24–512  | 32–256 |
|                      | <i>bla</i> <sub>CTX-M</sub> , <i>bla</i> <sub>TEM</sub> , <i>bla</i> <sub>SHV</sub> | <i>bla</i> <sub>OXA-48</sub>                                                         | +                 | 7               | 16–128    | 32–512  | 256     | 32–128 |
|                      | <i>bla</i> <sub>CTX-M</sub> , <i>bla</i> <sub>TEM</sub>                             | —                                                                                    | +                 | 2               | ND        | 32      | 256     | 32     |
|                      | <i>bla</i> <sub>CTX-M</sub> , <i>bla</i> <sub>TEM</sub> , <i>bla</i> <sub>SHV</sub> | <i>bla</i> <sub>IMP</sub>                                                            | +                 | 1               | ND        | 32      | 32      | 32     |
|                      | <i>bla</i> <sub>CTX-M</sub> , <i>bla</i> <sub>TEM</sub>                             | <i>bla</i> <sub>VIM</sub>                                                            | +                 | 1               | ND        | 512     | 256     | 128    |
| <i>K. pneumoniae</i> | <i>bla</i> <sub>CTX-M</sub> , <i>bla</i> <sub>TEM</sub> , <i>bla</i> <sub>SHV</sub> | <i>bla</i> <sub>OXA-48</sub>                                                         | -                 | 3               | 32        | 32–512  | 48–256  | 32–128 |
|                      | <i>bla</i> <sub>CTX-M</sub> , <i>bla</i> <sub>TEM</sub> , <i>bla</i> <sub>SHV</sub> | <i>bla</i> <sub>OXA-48</sub>                                                         | +                 | 24              | 12–255    | 32–512  | 48–256  | 32–127 |
|                      | <i>bla</i> <sub>CTX-M</sub> , <i>bla</i> <sub>TEM</sub>                             | <i>bla</i> <sub>OXA-48</sub>                                                         | -                 | 5               | 32–64     | 512     | 64–256  | 128    |
|                      | <i>bla</i> <sub>CTX-M</sub> , <i>bla</i> <sub>TEM</sub>                             | <i>bla</i> <sub>OXA-48</sub>                                                         | +                 | 5               | 64–128    | 24–512  | 32–256  | 32–256 |
|                      | <i>bla</i> <sub>CTX-M</sub> , <i>bla</i> <sub>TEM</sub>                             | <i>bla</i> <sub>OXA-48</sub> , <i>bla</i> <sub>VIM</sub> , <i>bla</i> <sub>IMP</sub> | -                 | 1               | ND        | 32      | 256     | 6      |
|                      | <i>bla</i> <sub>CTX-M</sub> , <i>bla</i> <sub>TEM</sub> , <i>bla</i> <sub>SHV</sub> | <i>bla</i> <sub>OXA-48</sub> , <i>bla</i> <sub>IMP</sub>                             | +                 | 6               | 64–256    | 256–512 | 128–256 | 64–128 |
|                      | <i>bla</i> <sub>CTX-M</sub> , <i>bla</i> <sub>TEM</sub> , <i>bla</i> <sub>SHV</sub> | <i>bla</i> <sub>OXA-48</sub> , <i>bla</i> <sub>IMP</sub>                             | -                 | 1               | 16        | 24      | 256     | 32     |
|                      | <i>bla</i> <sub>CTX-M</sub> , <i>bla</i> <sub>TEM</sub>                             | <i>bla</i> <sub>OXA-48</sub> , <i>bla</i> <sub>IMP</sub>                             | +                 | 2               | 32        | 32–512  | 64–256  | 8_16   |
|                      | <i>bla</i> <sub>CTX-M</sub> , <i>bla</i> <sub>TEM</sub>                             | —                                                                                    | +                 | 1               | ND        | 512     | 128     | 256    |
|                      | <i>bla</i> <sub>CTX-M</sub> , <i>bla</i> <sub>TEM</sub> , <i>bla</i> <sub>SHV</sub> | —                                                                                    | -                 | 2               | ND        | 32      | 256     | 32     |
|                      | <i>bla</i> <sub>CTX-M</sub> , <i>bla</i> <sub>TEM</sub> , <i>bla</i> <sub>SHV</sub> | <i>bla</i> <sub>OXA-48</sub> , <i>bla</i> <sub>VIM</sub> , <i>bla</i> <sub>IMP</sub> | +                 | 1               | ND        | 512     | 256     | 128    |
|                      | <i>bla</i> <sub>CTX-M</sub> , <i>bla</i> <sub>TEM</sub> , <i>bla</i> <sub>SHV</sub> | —                                                                                    | +                 | 1               | 64        | 512     | 128     | 128    |
|                      | <i>bla</i> <sub>CTX-M</sub> , <i>bla</i> <sub>TEM</sub> , <i>bla</i> <sub>SHV</sub> | <i>bla</i> <sub>OXA-48</sub>                                                         | +                 | 1               | ND        | 256     | 64      | 64     |
| <i>A. baumannii</i>  | <i>bla</i> <sub>CTX-M</sub> , <i>bla</i> <sub>TEM</sub> , <i>bla</i> <sub>SHV</sub> | <i>bla</i> <sub>OXA-48</sub>                                                         | +                 | 2               | 32–128    | 32–512  | 256     | 32–128 |
|                      | <i>bla</i> <sub>CTX-M</sub> , <i>bla</i> <sub>TEM</sub>                             | —                                                                                    | +                 | 3               | 16–32     | 512     | 256–512 | 8–128  |
|                      | <i>bla</i> <sub>CTX-M</sub> , <i>bla</i> <sub>TEM</sub>                             | <i>bla</i> <sub>OXA-48</sub>                                                         | +                 | 2               | 32–256    | 512     | 256     | 64–512 |
|                      | <i>bla</i> <sub>TEM</sub>                                                           | <i>bla</i> <sub>OXA-48</sub>                                                         | +                 | 3               | 32–128    | 512     | 256     | 32–128 |
|                      | <i>bla</i> <sub>CTX-M</sub> , <i>bla</i> <sub>TEM</sub>                             | <i>bla</i> <sub>VIM</sub>                                                            | -                 | 1               | ND        | 32      | 64      | 24     |

|                                |                                                                                     |                                                                                         |   |   |             |     |     |            |
|--------------------------------|-------------------------------------------------------------------------------------|-----------------------------------------------------------------------------------------|---|---|-------------|-----|-----|------------|
|                                | <i>bla</i> <sub>CTX-M</sub> , <i>bla</i> <sub>TEM</sub>                             | <i>bla</i> <sub>OXA-48</sub> ,<br><i>bla</i> <sub>VIM</sub> ,                           | + | 1 | 32          | 32  | 256 | 32         |
|                                | <i>bla</i> <sub>TEM</sub>                                                           | <i>bla</i> <sub>OXA-48</sub>                                                            | - | 1 | 32          | 32  | 256 | 32         |
|                                | <i>bla</i> <sub>CTX-M</sub> , <i>bla</i> <sub>TEM</sub> , <i>bla</i> <sub>SHV</sub> | <i>bla</i> <sub>VIM</sub>                                                               | + | 1 | 32          | 32  | 256 | 32         |
|                                | <i>bla</i> <sub>CTX-M</sub> , <i>bla</i> <sub>TEM</sub>                             | <i>bla</i> <sub>OXA-48</sub>                                                            | - | 1 | 256         | 512 | 512 | 32         |
|                                | <i>bla</i> <sub>CTX-M</sub>                                                         | <i>bla</i> <sub>OXA-48</sub>                                                            | + | 1 | 256         | 512 | 256 | 64         |
|                                | <i>bla</i> <sub>CTX-M</sub> , <i>bla</i> <sub>TEM</sub> , <i>bla</i> <sub>SHV</sub> | <i>bla</i> <sub>OXA-48</sub> ,<br><i>bla</i> <sub>NDM</sub>                             | + | 1 | 32          | 32  | 256 | 32         |
|                                | <i>bla</i> <sub>CTX-M</sub>                                                         | <i>bla</i> <sub>OXA-48</sub>                                                            | + | 1 | 256         | 512 | 256 | 64         |
|                                | <i>bla</i> <sub>TEM</sub>                                                           | <i>bla</i> <sub>OXA-48</sub> ,<br><i>bla</i> <sub>VIM</sub> , <i>bla</i> <sub>KPC</sub> | + | 1 | 256         | 512 | 256 | 64         |
|                                | <i>bla</i> <sub>TEM</sub>                                                           | <i>bla</i> <sub>OXA-48</sub> ,<br><i>bla</i> <sub>VIM</sub>                             | + | 1 | 32          | 32  | 256 | 32         |
| <i>P.</i><br><i>aeruginosa</i> | <i>bla</i> <sub>CTX-M</sub> , <i>bla</i> <sub>TEM</sub>                             | —                                                                                       | + | 2 | 128–<br>256 | 512 | 512 | 64–<br>128 |
|                                | <i>bla</i> <sub>CTX-M</sub> , <i>bla</i> <sub>TEM</sub> , <i>bla</i> <sub>SHV</sub> | <i>bla</i> <sub>VIM</sub>                                                               | + | 1 | 512         | 512 | 512 | 256        |
|                                | <i>bla</i> <sub>CTX-M</sub> , <i>bla</i> <sub>TEM</sub>                             | <i>bla</i> <sub>OXA-48</sub>                                                            | + | 1 | 16          | 512 | 512 | 8          |

**Table S2. P-values of the association between CR genes and the resistance to carbapenems in various species**

| <b>Bacterial Species</b> | <b>Genes</b>                | <b>Meropenem</b> | <b>Imipenem</b> |
|--------------------------|-----------------------------|------------------|-----------------|
| <i>E. coli</i>           | <i>bla<sub>KPC</sub></i>    | ND               | ND              |
|                          | <i>bla<sub>VIM</sub></i>    | 1                | 1               |
|                          | <i>bla<sub>NDM</sub></i>    | ND               | ND              |
|                          | <i>bla<sub>OXA-48</sub></i> | 0.614            | 0.136           |
|                          | <i>bla<sub>IMP</sub></i>    | 1                | 1               |
| <i>K. pneumoniae</i>     | <i>bla<sub>KPC</sub></i>    | ND               | ND              |
|                          | <i>bla<sub>VIM</sub></i>    | 0.026            | 0.011           |
|                          | <i>bla<sub>NDM</sub></i>    | ND               | ND              |
|                          | <i>bla<sub>OXA-48</sub></i> | 0.071            | 0.308           |
|                          | <i>bla<sub>IMP</sub></i>    | 1                | 0.592           |
| <i>A. baumannii</i>      | <i>bla<sub>KPC</sub></i>    | ND               | 1               |
|                          | <i>bla<sub>VIM</sub></i>    | ND               | 0.25            |
|                          | <i>bla<sub>NDM</sub></i>    | ND               | 1               |
|                          | <i>bla<sub>OXA-48</sub></i> | ND               | 0.3             |
|                          | <i>bla<sub>IMP</sub></i>    | ND               | ND              |
| <i>P. aeruginosa</i>     | <i>bla<sub>KPC</sub></i>    | ND               | ND              |
|                          | <i>bla<sub>VIM</sub></i>    | ND               | ND              |
|                          | <i>bla<sub>NDM</sub></i>    | ND               | ND              |
|                          | <i>bla<sub>OXA-48</sub></i> | ND               | ND              |
|                          | <i>bla<sub>IMP</sub></i>    | ND               | ND              |

*P*-values were calculated by Chi-Square or Fisher's exact tests where appropriate. Significant associations with *p*-values  $\leq 0.05$  are highlighted with a yellow color. ND, *P*-values could not be calculated as all isolates showed the same resistance phenotype (resistant or sensitive) or all isolates had the same genotype (the gene was present or absent in all).

**Table S3. P-values of the association between ESBL genes and the resistance to  $\beta$ -lactams in various species**

| Bacterial Species    | Gene                       | CEC | AMP | FOX   | AMC | SAM   | TPZ   | FEP | CRO | CTX | CAZ |
|----------------------|----------------------------|-----|-----|-------|-----|-------|-------|-----|-----|-----|-----|
| <i>E. coli</i>       | <i>bla<sub>SHV</sub></i>   | ND  | 1   | 1     | 1   | 0.529 | 0.628 | ND  | ND  | ND  | ND  |
|                      | <i>bla<sub>CTX-M</sub></i> | ND  | ND  | ND    | ND  | ND    | ND    | ND  | ND  | ND  | ND  |
|                      | <i>bla<sub>TEM</sub></i>   | ND  | ND  | ND    | ND  | ND    | ND    | ND  | ND  | ND  | ND  |
| <i>K. pneumoniae</i> | <i>bla<sub>SHV</sub></i>   | ND  | ND  | 0.567 | ND  | 0.145 | 1     | ND  | ND  | ND  | ND  |
|                      | <i>bla<sub>CTX-M</sub></i> | ND  | ND  | ND    | ND  | ND    | ND    | ND  | ND  | ND  | ND  |
|                      | <i>bla<sub>TEM</sub></i>   | ND  | ND  | ND    | ND  | ND    | ND    | ND  | ND  | ND  | ND  |
| <i>A. baumannii</i>  | <i>bla<sub>SHV</sub></i>   |     |     |       |     | ND    | 1     | ND  | ND  | ND  | ND  |
|                      | <i>bla<sub>CTX-M</sub></i> |     |     |       |     | ND    | 1     | ND  | ND  | ND  | ND  |
|                      | <i>bla<sub>TEM</sub></i>   |     |     |       |     | ND    | ND    | ND  | ND  | ND  | ND  |
| <i>P. aeruginosa</i> | <i>bla<sub>SHV</sub></i>   |     |     |       |     |       | ND    | ND  |     |     | ND  |
|                      | <i>bla<sub>CTX-M</sub></i> |     |     |       |     |       | ND    | ND  |     |     | ND  |
|                      | <i>bla<sub>TEM</sub></i>   |     |     |       |     |       | ND    | ND  |     |     | ND  |

P-values were calculated by Chi-Square or Fisher's exact tests where appropriate. Black cells correspond to untested antimicrobial agents. ND, P-values could not be calculated as all isolates showed the same resistance phenotype (resistant or sensitive) or all isolates had the same genotype (the gene was present or absent in all). AMP, ampicillin; AMC, amoxicillin/clavulanic acid; CAZ, ceftazidime; CEC, cefaclor; CRO, ceftriaxone; CTX, cefotaxime; FEP, Cefepime; FOX, ceftazidime; SAM, ampicillin/sulbactam; TPZ, piperacillin/tazobactam.

**Table S4.** P-values of the association between the *aac(6')-Ib* gene and the resistance to aminoglycosides and fluoroquinolones in various species

| Bacterial species    | Gentamicin 10 | Amikacin | Ciprofloxacin | Ofloxacin | Levofloxacin |
|----------------------|---------------|----------|---------------|-----------|--------------|
| <i>E. coli</i>       | ND            | ND       | ND            | ND        | ND           |
| <i>K. pneumoniae</i> | 0.677         | 0.244    | 1             | 0.07      | 0.07         |
| <i>A. baumannii</i>  | 0.046         | 0.15     | ND            |           | 0.404        |
| <i>P. aeruginosa</i> | ND            | ND       | ND            | ND        | ND           |

P-values were calculated by Chi-Square or Fisher's exact tests where appropriate. Black cells correspond to untested antimicrobial agents, while significant associations with  $p$ -values  $\leq 0.05$  are highlighted with a yellow color. ND, P-values could not be calculated as all isolates showed the same resistance phenotype (resistant or sensitive) or all isolates had the same genotype (the gene was present or absent in all).

**Table S5:** Primers used in this study, expected PCR product sizes, and annealing temperatures (T<sub>a</sub>)

| PCR reaction | Gene                        | Primer         | Primer sequence (5' → 3') | Expected PCR product size (bp) | T <sub>a</sub> (°C) | References |
|--------------|-----------------------------|----------------|---------------------------|--------------------------------|---------------------|------------|
| Multiplex    | <i>bla<sub>KPC</sub></i>    | P <sub>f</sub> | TGTCACTGTATCGCCGTC        | 1011                           | 50                  | [1]        |
|              |                             | P <sub>r</sub> | CTCAGTGCTCTACAGAAAACC     |                                |                     |            |
|              | <i>bla<sub>NDM</sub></i>    | P <sub>f</sub> | GGTTTGGCGATCTGGTTTTC      | 621                            |                     | [2]        |
|              |                             | P <sub>r</sub> | CGGAATGGCTCATCACGAT       |                                |                     |            |
| Multiplex    | <i>bla<sub>VIM</sub></i>    | P <sub>f</sub> | TCTACATGACCGCGTCTGTGC     | 748                            | 50                  | [3]        |
|              |                             | P <sub>r</sub> | TGTGCTTTGACAACGTTCCGC     |                                |                     |            |
|              | <i>bla<sub>OXA-48</sub></i> | P <sub>f</sub> | GCGTGGTTAAGGATGAACAC      | 438                            |                     | [1]        |
|              |                             | P <sub>r</sub> | CATCAAGTTCAACCCAACCG      |                                |                     |            |
| Monoplex     | <i>bla<sub>IMP</sub></i>    | P <sub>f</sub> | CTACCGCAGCAGAGTCTTTG      | 587                            | 50                  | [4]        |
|              |                             | P <sub>r</sub> | AACCAGTTTTGCCTTACCAT      |                                |                     |            |
| Multiplex    | <i>aac(6')-Ib</i>           | P <sub>f</sub> | TTGCGATGCTCTATGAGTGG      | 358                            | 49                  | [5]        |
|              |                             | P <sub>r</sub> | CGTTTGGATCTTGGTGACCT      |                                |                     |            |
|              | <i>bla<sub>SHV</sub></i>    | P <sub>f</sub> | GGTTATGCGTTATATTCGCC      | 867                            |                     | [6]        |
|              |                             | P <sub>r</sub> | TTAGCGTIGCCAGTGCTC        |                                |                     |            |
| Multiplex    | <i>bla<sub>CTX-M</sub></i>  | P <sub>f</sub> | CGCTTTGCGATGTGCAG         | 550                            | 51                  | [7]        |
|              |                             | P <sub>r</sub> | ACCGCGATATCGTTGGT         |                                |                     |            |
|              | <i>bla<sub>TEM</sub></i>    | P <sub>f</sub> | ATGAGTATTCAACATTTCCG      | 867                            |                     | [6]        |
|              |                             | P <sub>r</sub> | CTGACAGTTACCAATGCTTA      |                                |                     |            |

**Abbreviations:** P<sub>f</sub>, forward primer; P<sub>r</sub>, reverse primer; T<sub>a</sub>, annealing temperature.
